# 1 **Wastewater testing during the South African 2022-2023** 2 **measles outbreak demonstrates the potential of** 3 **environmental surveillance to support measles elimination**

4 Nkosenhle Ndlovu<sup>1</sup>, Victor Mabasa<sup>1</sup>, Chenoa Sankar<sup>1</sup>, Nosihle Msomi<sup>1</sup>, Emmanuel Phalane<sup>1</sup>, Natasha  
5 Singh<sup>1</sup>, Sipho Gwala<sup>1</sup>, Fiona Els<sup>1,2,4</sup>, Mokgaetji Macheke<sup>1</sup>, Sibonginkosi Maposa<sup>1</sup>, and Mukhlid  
6 Yousif<sup>¶1,3</sup>, Kerrigan M. McCarthy <sup>\*¶1,3,4</sup>

7

8 <sup>1</sup>Wastewater Genomics, Centre for Vaccines and Immunology, National Institute for Communicable  
9 Diseases, Johannesburg, Gauteng, South Africa,

10 <sup>2</sup>Gauteng City-Region Observatory (GCRO), Gauteng, South Africa,

11 <sup>3</sup>Department of Virology, School of Pathology, Faculty of Health Sciences, University of  
12 Witwatersrand, Johannesburg, Gauteng, South Africa.

13 <sup>4</sup> School of Public Health, Faculty of Health Sciences, University of Witwatersrand, Johannesburg,  
14 Gauteng, South Africa.

15

16 <sup>¶</sup>These authors contributed equally to this work

17

18 \*Corresponding author

19 Address: Centre for Vaccines and Immunology, National Institute for Communicable Diseases, 1  
20 Modderfontein Rd, Sandringham, Johannesburg, 2192, South Africa.

21 E-mail: [kerriganm@nicd.ac.za](mailto:kerriganm@nicd.ac.za)

22

## 23 **Author contributions**

| Name (Abbreviation)   | Contributions                                                                                                                                 | ORCID ID            |
|-----------------------|-----------------------------------------------------------------------------------------------------------------------------------------------|---------------------|
| Nkosenhle Ndlovu (NN) | Data curation, Formal analysis, Investigation, Writing – original draft                                                                       |                     |
| Victor Mabasa (VM)    | Conceptualisation, Formal analysis, Investigation, Methodology, Project administration, Resources, Software, Validation, Writing – review and | 0000-0002-0564-0344 |

NOTE: This preprint reports new research that has not been certified by peer review and should not be used to guide clinical practice.

|                          |                                                                                                                                                     |                     |
|--------------------------|-----------------------------------------------------------------------------------------------------------------------------------------------------|---------------------|
| Chenoa Sankar (CS)       | Data curation, Formal analysis, Investigation, Methodology, Software, Writing – review and editing                                                  | 0009-0007-7869-2026 |
| Nosihle Msomi (NM)       | Data curation, Formal analysis, Investigation, Software, Writing – review and editing                                                               | 0000-0003-0053-0928 |
| Emmanuel Phalane (EP)    | Data curation, Investigation, Writing – review and editing                                                                                          | 0000-0003-1208-3037 |
| Natasha Singh (NS)       | Investigation, Writing – review and editing                                                                                                         | 0000-0003-3074-8303 |
| Sipho Gwala (SG)         | Investigation, Writing – review and editing                                                                                                         | 0000-0002-8912-5584 |
| Fiona Els (FE)           | Writing – review and editing                                                                                                                        | 0000-0002-4169-813X |
| Mokgaetji Macheke (MM)   | Investigation, Writing – review and editing                                                                                                         | 0000-0002-5179-8230 |
| Sibonginkosi Maposa (SM) | Investigation, Project administration, Resources, Supervision, Writing – review and editing                                                         | 0000-0003-0575-1420 |
| Mukhlid Yousif (MY)      | Conceptualisation, Funding acquisition, Methodology, Supervision Validation, Writing – review and editing                                           | 0000-0002-8707-2255 |
| Kerrigan McCarthy (KM)   | Conceptualisation, Funding acquisition, Formal analysis, Methodology, Supervision, Validation, Writing original draft, Writing – review and editing | 0000-0001-8958-9795 |

## 25 **Abstract**

### 26 **Background**

27 Sensitive clinical surveillance and high vaccination coverage are required to meet the WHO 2030  
28 measles elimination target. Whilst wastewater and environmental surveillance (WES) has proven  
29 usefulness in polio surveillance, it has not been applied to measles control. We describe the  
30 development of digital RT-PCR (RT-dPCR) for detection and quantification of measles virus (MeV)  
31 in wastewater, and application to retained concentrated samples obtained from 28 national sentinel  
32 SARS-CoV-2 wastewater surveillance sites and 19 localised collection points in a single province  
33 before, during and after a measles outbreak of over 2,000 laboratory-confirmed cases.

### 34 **Methods**

35 We validated a RT-dPCR assay incorporating WHO-recommended primers for detection and  
36 differentiation of wild-type and vaccine genotypes. We applied this to retained wastewater samples  
37 concentrated by ultrafiltration and stored at -20°C. We compared wastewater findings by district and  
38 epidemiological weeks with laboratory-confirmed measles case data obtained from national fever-  
39 rash surveillance for districts with adequate surveillance indicators (>2/100,000 non-measles cases)

### 40 **Findings**

41 Amongst 2,149 wastewater concentrates obtained between 16 February 2021 and 08 March 2024, we  
42 identified 43 (2%) samples containing MeV RNA in concentrations ranging from 2,04-6,11 genome  
43 copies/mL. MeV genotype A (vaccine strain) was co-detected in wastewater in 6 instances along with  
44 non-A (wild-type) genotypes. Comparison of wastewater and clinical fever-rash surveillance data by  
45 epidemiological week and district identified 27 district-time instances where at least one positive  
46 wastewater sample was identified, of which 14 (52%) districts reported at least one laboratory-  
47 confirmed clinical case in that same epidemiological week. Amongst districts with positive  
48 wastewater samples, wastewater surveillance detected MeV in 13/27 (48%) time-district pairs when  
49 clinical surveillance failed to detect cases. Amongst district-time instances where at least one  
50 laboratory-confirmed measles case was detected (N=127), MeV was detected in at least one  
51 wastewater sample collected in that same epidemiological week in 14 (11%) districts

### 52 **Interpretation**

53 Wastewater surveillance may be a useful complementary surveillance tool for identification of  
54 districts with ongoing measles circulation. MeV detection rates may be improved by real-time testing  
55 to limit RNA degradation and improved concentration and nucleic acid extraction processes.  
56 Ongoing wastewater surveillance for MeV should be conducted in order to understand the role of  
57 WES in measles control and elimination.

### 58 **Funding**

59 This work was funded by BMGF (INV-049271)

60

## 61 Introduction

62 Measles, a highly infectious, vaccine-preventable viral infection, is targeted by the World Health  
63 Organization (WHO) for elimination by 2030[1]. Measles incidence and mortality have declined  
64 dramatically since the year 2000 due to increasing global vaccination coverage from 72% in 2000 to  
65 83% in 2022, despite a transient decline in 2021 due to the COVID-19 pandemic.[2] Global measles  
66 indicators have decreased from 1,072,800 deaths and 145 cases per million in 2000, to 136,200 deaths  
67 and 29 cases per million in 2022, of which the largest reduction originates from the WHO-AFRO region  
68 (85,417 deaths)[2,3]. Despite these improvements, and recovery of vaccination coverage after the  
69 decline during the COVID-19 pandemic, measles is still a leading cause of child death under the age of  
70 5 years in low- and middle-income countries[3]. In support of the 2021-2030 strategic framework for  
71 measles and rubella elimination, ongoing global efforts are in place to control viral transmission[1].  
72 These include the provision of two doses of measles vaccine before the age of 5 years as part of the  
73 expanded programme of immunisation (EPI)[4], supplementary immunisation activities (SIAs) every  
74 4-5 years where routine vaccination coverage does not achieve 95% coverage, fever-rash surveillance,  
75 and rapid, outbreak response[1]. High vaccination coverage and sensitive surveillance systems are vital  
76 to achieving elimination.[1]

77 As measles elimination targets and dates approach, the WHO and national public health authorities rely  
78 increasingly on measles surveillance to support program monitoring.[1] However, clinical measles  
79 surveillance has several limitations. Firstly, many patients and their care-givers do not seek medical  
80 care especially when their clinical presentation is uncomplicated. Secondly, health system factors  
81 including clinician awareness, propensity to test and notify, financial allocations for testing, and  
82 submission of diagnostic specimens often limit submission of diagnostic specimens[5]. Thirdly,  
83 incomplete provision of clinical data (such as date of rash onset and vaccination history) leads to  
84 challenges in case classification, contact tracing and outbreak response[6]. Fourthly, urine or throat  
85 swabs are less frequently submitted for PCR testing, rendering genomic surveillance challenging as the  
86 blood submitted for serology testing infrequently contains measles virus (MeV). [7]

87 The National Institute for Communicable Diseases (NICD) in Johannesburg, South Africa is one of 86  
88 accredited World Health Organization Global Measles and Rubella Laboratory Network (GMRLN)  
89 laboratories and conducts measles testing (IgM and IgG serology, PCR, and sequencing) for South  
90 Africa and the southern Africa region.[8] Blood from suspected measles cases (any person with fever,  
91 rash and one of cough, conjunctivitis or coryza) is submitted by provincial and district health department  
92 staff to the NICD. South African surveillance indicators have consistently achieved more than the  
93 required two non-measles fever-rash cases/100,000, except for 2020, when this threshold was only just  
94 attained during the SARS-CoV-2 pandemic. [9]

95 Intermittent measles outbreaks have continued to occur over the last 25 years in South Africa, the largest  
96 of which led to over 21,000 laboratory-confirmed cases[9–11]. Most recently, an outbreak of over  
97 1,383 cases commenced in 2022 following apparent importation of the B3 genotype from immediate  
98 neighbours.[12,13] The majority of laboratory-confirmed cases were under 15 years of age, with attack  
99 rates as high as 31/100,000 in selected age groups and provinces.[12,13] The measles SIA was  
100 conducted from February- April 2023 targeting children 1-15 years of age, however only a 54%  
101 coverage rate was achieved (personal communication, WHO-AFRO Daudi Peter Manyanga).

102 Wastewater and environmental surveillance (WES) is presently used to provide highly sensitive  
103 surveillance data as part of the WHO-lead global polio elimination initiative (GPEI).[14,15] In 2022  
104 and 2023, following widespread uptake of WES to support SARS-CoV-2 and Mpox  
105 surveillance,[16,17] the WHO issued and subsequently updated guidance to support the  
106 implementation of WES as a complementary surveillance tool for SARS-CoV-2 outbreak preparedness  
107 and response.[18] On the basis of these global experiences, it has been suggested that WES be applied  
108 as a surveillance tool for other pathogens targeted for elimination.[19] Whilst a number of groups have  
109 developed testing methodologies,[20–23] measles WES has not been implemented as part of routine  
110 surveillance or during outbreak response. To date, only Benschkop *et al* detected MeV in 6/56 (10,7%)  
111 wastewater samples collected for polio surveillance during a measles outbreak in a vaccine-hesitant  
112 community.[24]

113 In 2020, the NICD expanded polio testing at 18 WES sentinel sites to include SARS-CoV-2 across nine  
114 provinces of SA.[25] Over time, and dependent on funding, the number and location of sites changed.  
115 Presently, the NICD coordinates a national WES sentinel surveillance network comprising sampling  
116 sites at 28 wastewater treatment plants (WWTPs) across nine South African provinces and border  
117 transit points, and a network of 19 sampling sites located within the catchment areas of three large  
118 WWTPs in the densely populated Gauteng Province.[25] In this paper, we describe the development,  
119 optimization and validation of a RT-dPCR assay for detection and quantification of MeV in wastewater,  
120 which we applied to retained concentrated wastewater samples from the national sentinel surveillance  
121 network and Gauteng catchment sites. As wastewater samples were collected during the ongoing  
122 national measles outbreak that began in October 2022, we compared wastewater findings with clinical  
123 surveillance data to explore the role of WES as a complementary surveillance tool for programmatic  
124 purposes.

## 125 **Methods and methods**

### 126 **Study design and context**

127 We developed and compared RT-qPCR and RT-dPCR assays that detected and differentiated MeV  
128 vaccine and wild-type strains. We applied these and a RT-dPCR assay for PMMoV (to normalize MeV

129 results relative to fecal contamination) to retained concentrates of wastewater samples collected from  
130 the NICD wastewater surveillance network. Presently the network comprises 28 national WWTP  
131 sentinel sites and 19 Gauteng sub-catchment inspection holes. Sampling commenced in February 2021  
132 or later, and progressively included all nine SA provinces (Fig 1).

133

134 **Figure 1. Sampling locations at South African wastewater treatment plants (national sentinel**  
135 **surveillance sites) and in-line sewer sampling sites (sub-catchment areas in City of Tshwane,**  
136 **Johannesburg and Ekurhuleni, inset)**

137

## 138 **Laboratory methods**

### 139 *Wastewater sample collection, concentration and storage.*

140 Grab samples of one liter in volume were collected monthly, weekly or biweekly from collection sites  
141 and were transported at 4°C to the NICD within 24 hours of collection. On receipt, samples were  
142 refrigerated at 4°C, and within 24-48 hours, 200mL of raw sewage was centrifuged at 4650g at 4°C  
143 for 30 minutes to clarify the sample. Then 70mL of supernatant was centrifuged at 3500g for 15 minutes  
144 through a Centricon® Plus-70 centrifugal ultra-filter (Merck Millipore, Tullagreen, Ireland). Material  
145 retained in the filter was eluted to a concentrate volume of approximately 1 mL. Concentrates were  
146 processed immediately for SARS-CoV-2, and the balance was retained at -20 °C for extraction and  
147 PCR once MeV and other assays were developed and validated

148

149

150

### 151 *Primers and probes for measles and pepper mild mottle virus (PMMoV) detection*

152 Measles- and pepper mild mottle virus (PMMoV)-specific primers and probes were identified from  
153 previously described methods (Table 1)[26,27]. We then designed primers and probes to detect MeV  
154 genotypes dominant in recent South African outbreaks (B3, D8 and H1) and differentiate these from  
155 vaccine strain (genotype A). These were designed by retrieving partial reference genome sequences  
156 coding for the N gene of these genotypes from NCBI. Sequence alignments were performed using  
157 MAFFT, and BioEdit was used to identify regions of similarity and difference[28]-[29]. Candidate  
158 primers were checked for *in silico* specificity, secondary structure formation, GC content and melting  
159 temperature using BLAST ([blast.ncbi.nlm.nih.gov/Blast.cgi](https://blast.ncbi.nlm.nih.gov/Blast.cgi)) and OligoAnalyzer Tool  
160 ([www.idtdna.com](http://www.idtdna.com)). Final sequences and alignments are shown in Figure 2. Wild-type and vaccine  
161 probes were created and labeled with ROX and FAM dyes respectively by Integrated DNA Technology  
162 (Coralville, Iowa, USA)

163 **Table 1. Primers, probes and source references used for PCR detection of measles virus in**  
 164 **wastewater samples.**

| Target                         | Genes              | Primer name   | Sequence (5'-3')               | Ref                         |
|--------------------------------|--------------------|---------------|--------------------------------|-----------------------------|
| MeV pan                        | Nucleocapsid       | MVN1139       | TGGCATCTGAACTCGGTATCAC         | Yoshioka N et al.,2013 (31) |
|                                |                    | MVN1213R      | TGTCCTCAGTAGTATGCATTGCAA       |                             |
|                                |                    | MVNP1163Probe | TAMRA-CCGAGGATGCAAGGCTTGTTCAGA |                             |
| MeV vaccine (genotype A)       | Nucleocapsid       | VMA168F       | GAGATTGGGGGGCAAGGAAGAT         | In-house primers            |
|                                |                    | VMA242R       | GCATCACTTGCTCTGCTGGGCC         |                             |
|                                |                    | VMA190P       | FAM-AGGAGGGTCAAACAGAGTCGA-MGB  |                             |
| MeV wild-type (genotype non-A) | Nucleocapsid       | VMB168F       | RRGATTRGGGGGYAAGGARGAY         | In-house primers            |
|                                |                    | VMB242R       | RCATCACTTGMTCTGCTRGRYY         |                             |
|                                |                    | VMB190P       | ROX-AGGAGGGTCARACAGARYCGR      |                             |
| PMMoV                          | Unspecified 5' end | PMMOV_END_F   | TTC GCA CTG CAC GGA TAA AGT AT | Daire N et al.,2022 (33)    |
|                                |                    | PMMOV_END_R   | GCC CCA AAT TCA TCT GCT GGA A  |                             |
|                                |                    | PMMOV_END_M   | FAM-ACGCTGTCGCTTTGC            |                             |

165

166

167 **Figure 2. Primers and probe design to differentiate measles virus vaccine strain (Edmonston)**  
 168 **from wild genotypes (B3, D8, and H1).**

169 ***Digital PCR optimisation and determination of limit of detection***

170 We determined the limit of detection (LOD) (defined as the concentration in genome copies/uL of the  
 171 lowest dilution that is theoretically detectable when using optimized methods) with a single- and duplex  
 172 RT-dPCR assay using pan-MeV primers with and without rubella virus (Ruv) primers (not described).  
 173 In triplicate, we serially diluted the measles RNA-positive control provided by the Global Measles  
 174 Reference Laboratory Network (GMRLN) in 14 two-fold dilutions (neat to 1:16,384) and subjected  
 175 these to the QIAcuity OneStep Advanced Probe RT-dPCR assay (Qiagen, Hilden, Germany) on  
 176 QIAcuity® One, 5plex System dPCR platform (Qiagen) using 96-well 8.5k nanoplates. The pan-MeV  
 177 RT-dPCR master mix contained 3 µL of 4× QIAcuity One-Step Advanced Probe Master Mix, 0.12 µL  
 178 of 100× One-Step Advanced RT-Mix, 0.6 µL of 20× primer-probe mix MeV (TAMRA), 0.6 µL of 20×  
 179 RuV primer-probe mix (data not shown) (Cy5) and 1 µL of QIAcuity Enhancer GC. The same master



180 mix set-up was used for vaccine and wild-type primers and probe reactions. Cycling conditions for RT-  
181 dPCR were reverse transcription at 50°C for 40 minutes, RT enzyme inactivation at 95°C for 1 minute  
182 and 45 cycles of annealing & extension at 60°C.

183 Each RNA dilution of the positive control was also tested using RT-qPCR conducted on the Applied  
184 Biosystems® 7500 Real-Time PCR System (Applied Biosystems, Foster City, CA, USA) using the  
185 QIAcuity One-Step Advanced Probe Master Mix. The RT-qPCR master mix contained 4x One-Step  
186 Advanced Probe Master Mix 6.25 µL, 100x One-Step Advanced RT-Mix 0.25 µL, 20x primer-probe  
187 mix MV (TAMRA) 1.25 µL, 20x primer-probe mix RV (Cy5) 1.25 µL, Enhancer GC 2 µL, RNase-  
188 free water 6 µL.

### 189 ***Testing of retained wastewater concentrates***

190 Following thawing, retained concentrates were tested in batches of 92 samples. Total nucleic acids were  
191 extracted from 200 µL of viral concentrate on the 96 KingFisher Flex Purification System (Thermo  
192 Fisher Scientific, Waltham, MA USA) using the MagMAX™ Wastewater Ultra Nucleic Acid Isolation  
193 kit (Thermo Fisher Scientific) according to the manufacturers instructions. Briefly, nucleic acids were  
194 captured in 520 µL of lysis binding solution before they were washed in 1ml of Wash 1 and 3 solutions  
195 and eluted in 60 µL of elution buffer. We used the formula below to determine the genome copy number  
196 per millilitre of the original wastewater sample:

$$197 \quad SC = (C_{rxn} * V_{rxn vol.} * (\frac{V_{elute}}{V_{NA}}) * (\frac{V_{total conc.}}{V_{conc. extracted}})) / V_{sample conc.}$$

198  $SC$  = Sample concentration (gc/ml)

199  $C_{rxn}$  = Concentration (gc/µl) obtained from dPCR machine.

200  $V_{rxn vol.}$  = Volume (µl) of the PCR reaction.

201  $V_{elute}$  = Total volume (µl) of the extraction elute.

202  $V_{NA}$  = Volume (µl) of nucleic acids used in the PCR reaction.

203  $V_{total conc.}$  = Total volume (µl) of the concentrate.

204  $V_{conc. extracted}$  = Volume (ml) of concentrate used for extraction.

205  $V_{sample conc.}$  = Volume of the wastewater sample concentrated.

206

### 207 ***Differentiation of wild-type and vaccine strains***

208 After identification of MeV positive wastewater samples, we returned to residual retained concentrates  
209 from these samples and subjected them to a second extraction and PCR using the QIAcuity® One, 5plex  
210 System (Qiagen, Hilden, Germany) as described above using both vaccine and wild-type primers to  
211 determine genotype A (vaccine) vs non-genotype A (wild-type)(31). we used the commercially  
212 available OMZYTA® MMR live attenuated vaccine (derived from Enders' attenuated Edmonston  
213 strain) and RNA from clinical samples collected during an outbreak in South Africa, as positive controls  
214 for vaccine and wild-type respectively,

## 215 **Fever-rash surveillance and diagnostic testing**

### 216 *2.1.2. Fever-rash surveillance*

217 Blood specimens from persons with suspected measles are transported to NICD on ice, and tested for  
218 the presence of both measles-specific immunoglobulin M (IgM) antibodies using Euroimmun Anti-  
219 Measles virus ELISA (IgM), (Euroimmun AG, Luebeck, Germany). In the absence of vaccination  
220 history, NICD surveillance protocols define a laboratory-confirmed case as a positive IgM serologic  
221 test for measles in a person with fever, rash and one of cough, conjunctivitis or coryza.

222

## 223 **Data analysis**

### 224 *Comparison of dPCR and qPCR results, determination of limit of detection and indicators of fecal* 225 *contamination*

226 We conducted a regression comparing qPCR Ct thresholds and dPCR genome copies/reaction for each  
227 dilution of the positive control in monoplex (MeV) and duplex (MeV plus RuV) to determine the limit  
228 of detection (LoD) and to assist with interpretation of low concentrations of MeV detected by dPCR  
229 (Fig 1). We determined the presence and concentration of PMMoV in gc/uL, and determined the ratio  
230 of MeV:PMMoV

231

232

233 **Fig 3. PCR reactions using serial dilutions (1:32 to 1:16,384) of control sequences (obtained**  
234 **from the World Health Organization Global Measles and Rubella Laboratory Network**  
235 **programme) of measles virus (MeV, red) and MeV duplexed with rubella virus (RuV, blue)**  
236 **showing (A) genome copies per microlitre of reaction (vertical axis) by dilution, (dilutions 1:32,**  
237 **1:64, 1:128, 1:256, 1:512 omitted from the insert) and (B) the cycle threshold (vertical axis) and**  
238 **log of genome copies per microlitre (gc/uL) (horizontal axis). The limit of detection was**  
239 **determined to be 0,365 gc/uL in duplex reaction with RuV.**

240

### 241 *2.4.2. Comparison of clinical surveillance and wastewater measles testing data*

242 We grouped and tallied the total number and the number of IgM-positive clinical specimens submitted  
243 for testing by epidemiological week of sample collection and district of health facility where the case  
244 was identified using case-line lists collected as part of national measles fever-rash surveillance. We also  
245 grouped and tallied wastewater samples by epidemiological week and district. We merged these clinical  
246 and wastewater results by epidemiological week and district and eliminated week-district pairs where  
247 no wastewater samples were tested. We defined a ‘positive concordant wastewater-clinical pair’ as any  
248 instance in a given epidemiological-week in a specified district where at least one wastewater sample  
249 tested positive for MeV and one case was identified. Conversely we defined a ‘negative concordant  
250 pair’ as one where all wastewater and clinical samples tested negative or no clinical samples were

251 submitted. The remaining ‘discordant’ pairs were those where least one case was detected but all  
252 wastewater samples were negative, or vice versa. We determined and described the proportion of  
253 concordant and discordant week-district pairs, and presented these in two-by-two tables. In concordant  
254 instances, we also determined the relationship between the number of measles cases detected and the  
255 proportion testing positive with the wastewater levels of MeV in genome copies/mL using simple  
256 regression. Given intrinsic weaknesses in measles surveillance (e.g. absent patient health seeking), we  
257 investigated and described the discordant instances where MeV was detected in wastewater, but no  
258 clinical cases were detected, to identify if clinical cases had been identified in neighbouring districts in  
259 the same epidemiological week, or in the same district during the week before or after the positive  
260 sample.

## 261 **Ethics**

262 The protocol for this study was reviewed and approved by the University of the Witwatersrand Human  
263 Research Ethics Committee (MM220904)

## 264 **Results**

### 265 **RT-dPCR assay optimisation and determination of the limit of detection**

266 The manufacture’s cycling profile recommended extension for 30s was increased to 1 minute, and the  
267 cycling profile increase from 40 to 45 cycles in order to obtain optimal separation of positive and  
268 negative partitions on the RT-dPCR platform. Our in-house primers and assay successfully  
269 differentiated clinical MeV strains from vaccine strain (see Supplement). Following optimization of  
270 MeV and multiplex MeV and RuV qPCR and dPCR protocols, we determined the relationship between  
271 the number positive dPCR partitions and Ct values of qPCR (Fig 1). The limit of detection was  
272 determined to be 0,365 gc/uL in duplex reaction with RuV.

273

274

### 275 **Testing of retained concentrates from wastewater samples**

276

277 A total of 2,149 wastewater concentrates had been stored after processing of grab samples collected  
278 across nine provinces between 16 February 2021 and 08 March 2024. Wastewater samples from  
279 Limpopo, Mpumalanga, NorthWest and the Northern Cape provinces accounted for 58/2149 (2,6%) as  
280 sampling from these sites commenced in November 2023-January 2024, or ceased in May 2022  
281 (Northern Cape Province). Retained concentrates underwent extraction and duplex MeV and RuV  
282 (results not presented here) PCR in batches from November 2023 to March 2024. Of the total, 43  
283 samples (2%) tested positive for MeV (Table 2). The majority of wastewater samples were collected  
284 in Gauteng province (n=1492), which also had the highest percentage of samples positive for MeV (31,  
285 2,1%, Table 2). No MeV was detected in wastewater from the provinces with the lowest numbers of

286 tested samples (Table 1). Over the two year period, the majority of positive samples were identified in  
 287 2024 (Fig 2, Fig S2). Amongst 42 samples undergoing PCR genotyping, 6 tested positive for both A  
 288 (vaccine) and non-A (wild-type) genotypes , whilst 36 tested positive for non-A (wild-type) genotype  
 289 only. All but one sample with vaccine strain detected were collected in Gauteng province, and all were  
 290 collected at least one month after completion of the national outbreak response SIA. The median MeV  
 291 concentration amongst positive samples was 2,12 (2,04-2,25) gc/mL, and the median ratio of  
 292 MeV:PMMoV was  $441 \times 10^{-3}$  (range  $276 \times 10^{-3}$  -  $1528 \times 10^{-3}$ ).

293

294 **Table 2: The number of samples tested for MeV by province (and district of Gauteng Province)**

295 together with the number and proportion testing positive and the range of genome copies/uL amongst  
 296 positive samples. All samples tested positive for crAssphage, and the range of quantitative results in  
 297 genome copies/uL is also provided.

298

| Province            | District                              | Time period   |            | MeV (# tested) | MeV (# positive, %) | MeV gc/mL (median Q1 - Q3) | PMMoV gc/mL (median, Q1-Q3) | Ratio MeV:PMMoV $\times 10^{-3}$ (median, Q1-Q3) |
|---------------------|---------------------------------------|---------------|------------|----------------|---------------------|----------------------------|-----------------------------|--------------------------------------------------|
|                     |                                       | Date from     | Date to    |                |                     |                            |                             |                                                  |
| Eastern Cape        | Buffalo City and Nelson Mandela Metro | April 2021    | March 2024 | 187            | 3 (1.6)             | 2,12 (2,05-6,4)            | 404 (346-504)               | 7,37 (5,33-16,9)                                 |
| Free State          | Mangaung                              | August 2021   | March 2024 | 183            | 3 (1,6)             | 2,17 (2,07-4,12)           | 310 (155-548)               | 11,17 (6,96-15,37)                               |
| Gauteng             | City of Tshwane                       | April 2021    | March 2024 | 637            | 13 (2)              | 2,12 (2,08-6,11)           | 1017 (338-2871)             | 3,27 (1,11-8,04)                                 |
| Gauteng             | City of Ekurhuleni                    | April 2021    | March 2024 | 547            | 13 (2.4)            | 2,11 (2,04-2,19)           | 442 (316-1421)              | 5,54 (1,43-15,78)                                |
| Gauteng             | City of Johannesburg                  | April 2021    | March 2024 | 308            | 5 (1.6)             | 2,14 (2,11-2,16)           | 177 (123-199)               | 11,29 (10,96-17,49)                              |
| KwaZulu-Natal       | eThekwin                              | August 2021   | March 2024 | 149            | 5 (3,4)             | 2,04 (2,04-4,17)           | 1079 (387-2343)             | 4,08 (0,87-5,27)                                 |
| North West          | Bojanala                              | November 2023 | March 2024 | 22             | 0                   | -                          | 1231 (653-1914)             | -                                                |
| Northern Cape       | Namakwa                               | August 2021   | May 2022   | 14             | 0                   | -                          | 927 (505 - 105)             | -                                                |
| Western Cape        | City of Cape Town                     | August 2021   | March 2024 | 72             | 1 (1.4)             | 2.1*                       | 1934                        | 1,1                                              |
| Mpumalanga          | Ehlanzeni                             | February 2024 | March 2024 | 10             | 0                   | -                          | 616 (217- 821)              | -                                                |
| Limpopo             | Mopani                                | February 2024 | March 2024 | 12             | 0                   | -                          | 370 (201 - 740)             | -                                                |
| <b>South Africa</b> |                                       | April 2021    | March 2024 | 2149           | 43 (2)              | 2,12 (2,04-2,25)           | 441 (276-1528)              | 5,27 (1,37-15,72)                                |

299

300

301

302 **Fig 4: Epidemiological curve showing the number clinical cases submitted to the National**  
303 **Institute for Communicable Diseases as part of fever-rash surveillance that tested positive for**  
304 **measles IgM (blue bars) and the number of positive wastewater samples (orange or green) by**  
305 **epidemiological week (2021, week 52, to 2024, week 10) from A) the entire South Africa, and B)**  
306 **Gauteng Province**

307  
308  
309

### 310 **Comparison of clinical surveillance data with wastewater MeV samples.**

311 For each district, the number and proportion of wastewater samples testing positive over the period of  
312 observation ranged from 0 to 40% (week 12, 2023 Ekurhuleni Metropole) as seen in Fig 2A&B and S2.  
313 We identified 481 epidemiological week-districts where both wastewater samples and clinical  
314 diagnostic tests were submitted for surveillance. Amongst week-districts, some districts had multiple  
315 wastewater samples (median=2, range 1-19 samples) for a given week from a number of sampling  
316 locations (n=1-7), and 357 week-district pairs had more than one positive clinical case per week,  
317 ranging from 1-104 cases, with a median of 3 cases per week.

318 Amongst all week-district pairs, measles was identified in the week-district by both wastewater and  
319 clinical surveillance in 2.9% (14) pairs, or, by neither wastewater and clinical surveillance in 343 (71%)  
320 of pairs (Table 3). Discordance was observed in the remaining 124 (25.8%) of week-district pairs of  
321 which the larger proportion (23.1%) were those with negative wastewater samples in districts where  
322 clinical cases were detected. When the time frame for a concordant positive test was broadened to  
323 include the presence of clinical cases up to a week before or after a positive wastewater sample, the  
324 number of clinical-wastewater time-district pairs where wastewater tested positive and clinical cases  
325 were detected increased to 17 (3.5%), whilst the number of time-district pairs where wastewater  
326 detected evidence of measles and clinical surveillance failed to detect a case, decreased to 10 (2.1%,  
327 Table 3). Amongst concordant wastewater and clinical week-district pairs, there was no discernable  
328 relationship between number of cases and measles genome copies/ml in wastewater. Amongst  
329 discordant week-district pairs where MeV was detected in wastewater (Table 4), no clinical testing was  
330 conducted in nine districts during that week, whilst 1-15 laboratory-confirmed cases of measles were  
331 identified in eight of 14 neighbouring districts.

332 For both wastewater and clinical surveillance, results were considered positive if one or more specimens  
333 or samples tested positive in that epidemiological week, and negative if no specimens or samples tested  
334 positive. In part A, clinical results were evaluated for the same epidemiological week as wastewater  
335 results. In part B, clinical results from the previous, same and next epidemiological week were  
336 considered together and compared with wastewater results for a specific week, in order to accommodate  
337 for a 7-14 day measles incubation period. No dose-relationship was discernable between the

338 concentration of MeV detected in wastewater and the number of laboratory-confirmed cases in the same  
 339 district and epidemiological week (Figure S2)

340

341 **Table 3. A comparison of wastewater and clinical testing results in the same district and**  
 342 **epidemiological week for surveillance conducted between epidemiological week 7, 2021 to**  
 343 **epidemiological Week 10, 2024.**

| Part A: same epidemiological week                                                  |                | Wastewater Results |             |       |
|------------------------------------------------------------------------------------|----------------|--------------------|-------------|-------|
|                                                                                    |                | Positive           | Negative    | Total |
| Clinical Results (IgM)                                                             | Positive (IgM) | 14 (2.9%)          | 111 (23.1%) | 125   |
|                                                                                    | Negative (IgM) | 13 (2.7%)          | 343 (71.3%) | 356   |
|                                                                                    | Total          | 27                 | 454         | 481*  |
| Part B: same epidemiological week + clinical results one week before and one after |                | Wastewater Results |             |       |
|                                                                                    |                | Positive           | Negative    | Total |
| Clinical Results (IgM)                                                             | Positive (IgM) | 17 (3.5%)          | 190 (39.5%) | 207   |
|                                                                                    | Negative (IgM) | 10 (2.1%)          | 264 (54.9%) | 274   |
|                                                                                    | Total          | 27                 | 454         | 481   |

344

345 **Table 4. Fever-rash surveillance results for epidemiological weeks and districts where wastewater**  
 346 **samples tested positive for measles RNA during epidemiological week 7, 2021 to epidemiological**  
 347 **Week 10, 2024.** Epidemiological weeks are designated with the year followed by the week number.

| Epidemiological week | District     | District under observation  |                         | Clinical cases in neighbouring districts |                       |                      |
|----------------------|--------------|-----------------------------|-------------------------|------------------------------------------|-----------------------|----------------------|
|                      |              | Wastewater (positive/total) | Clinical (IgM +/-total) | Cases in that week                       | Cases the week before | Cases the week after |
| 2021-W45             | Ekurhuleni   | 1/2                         | .                       | 0                                        | 0                     | 0                    |
| 2021-W45             | Tshwane      | 1/2                         | .                       | 0                                        | 0                     | 0                    |
| 2022-W04             | Buffalo city | 1/2                         | .                       | 0                                        | 0                     | 0                    |
| 2022-W04             | Ekurhuleni   | 1/2                         | 0/2                     | 2                                        | 0                     | 2                    |
| 2022-W05             | Ethekwini    | 1/2                         | .                       | 0                                        | 0                     | 0                    |
| 2022-W07             | Buffalo city | 1/2                         | .                       | 0                                        | 0                     | 0                    |
| 2022-W18             | Tshwane      | 1/2                         | 0/2                     | 1                                        | 0                     | 1                    |
| 2022-W42             | Ekurhuleni   | 1/2                         | .                       | 5                                        | 4                     | 5                    |
| 2023-W12             | Ethekwini    | 1/1                         | 0/6                     | 0                                        | 1                     | 1                    |
| 2023-W12             | Mangaung     | 1/2                         | 0/2                     | 4                                        | 1                     | 1                    |
| 2023-W15             | Ekurhuleni   | 1/1                         | 0/1                     | 15                                       | 15                    | 7                    |
| 2023-W20             | Johannesburg | 1/6                         | .                       | 9                                        | 12                    | 12                   |
| 2023-W25             | Ethekwini    | 1/1                         | .                       | 0                                        | 0                     | 0                    |
| 2023-W33             | Ekurhuleni   | 1/5                         | 0/1                     | 7                                        | 4                     | 9                    |
| 2023-W37             | Buffalo city | 1/4                         | .                       | 0                                        | 0                     | 0                    |



|          |            |      |     |   |   |    |
|----------|------------|------|-----|---|---|----|
| 2023-W37 | Ekurhuleni | 1/10 | 0/1 | 2 | 9 | 12 |
|----------|------------|------|-----|---|---|----|

348

349

350

## 351 4. Discussion

352 Retrospective testing of retained wastewater concentrates sampled from national and sentinel site  
353 surveillance during an ongoing measles outbreak in South Africa detected MeV RNA at copy numbers  
354 ranging from 1,97 - 165,8 gc/mL in 43 (2%) of wastewater samples. We observed positive MeV  
355 wastewater detections in health districts where no cases were detected. Despite likely RNA decay on  
356 account of sample storage, our results illustrate the usefulness of this surveillance modality, and suggest  
357 that real-time wastewater surveillance should be conducted together with clinical surveillance to  
358 determine the sensitivity of MeV WES and to develop appropriate public health responses to wastewater  
359 findings.

360 For a number of reasons, we believe that detection of MeV in wastewater is representative of measles  
361 infections in the catchment area and district and has public health significance. Firstly, MeV is excreted  
362 in urine for up to 14 days post vaccination,[30] and will therefore be present in wastewater following  
363 wild-type infection. Secondly, viruses from point sources may be detectable in sewage networks for  
364 several days after shedding ceases on account of dispersion due to differing gradients, varying flow  
365 rates and entrapment in sediment.[31] Thirdly, a positive finding of MeV in wastewater samples even  
366 at low copy numbers, is likely to be true, as we demonstrated validity of low copy numbers by testing  
367 serial dilutions of positive controls by qPCR and dPCR. Fourthly, MeV has been detected in wastewater  
368 in an outbreak context.[24] and in low copy numbers ranging from 2-22 genome copies per  
369 milliliter[23]. Fifthly, in our study, laboratory-confirmed measles cases were detected in 14/27 (52%)  
370 districts where wastewater tested positive for MeV. MeV negative results in the remaining districts may  
371 be explained by the intrinsic limitations of wastewater detection for viral RNA targets (such as viral  
372 decay in wastewater matrix, and/or excessive dilution, or timing of sampling), geographical mismatch  
373 between case location and wastewater catchment area, or due to prolonged storage of concentrates at -  
374 20°C. Lastly, the finding of MeV in wastewater when clinical surveillance fails to identify cases  
375 indicates potential for measles outbreaks in our context where vaccination coverage is reportedly less  
376 than 95%.

377 Several limitations are evident from our findings. Sample storage and wastewater concentration  
378 methods (ultrafiltration) may have contributed to low viral recovery rates and concentrations[32]. Real  
379 time processing and newer concentration-extraction methodologies may enhance detection rates.  
380 Despite wastewater sample collection during an outbreak (October 2022 and ongoing) and subsequent

381 12 week vaccination campaign (February to April 2023), we identified vaccine genotype in only 6  
382 samples, all of which were collected outside the campaign window. RNA decay, and viral dynamics in  
383 wild-type infection vs vaccine inoculation, coupled with vaccination of largely immune persons may  
384 account for this. This may account for the absence of a dose-response relationship between the  
385 concentration of MeV detected in wastewater and the number of laboratory-confirmed cases in the same  
386 district and epidemiological week. Lastly, in the context of the coupling of measles and rubella vaccine  
387 and combined programmatic goals, there is merit in using a multiplex assays for WES detection of  
388 measles and rubella wild-type and vaccine strain detection. Our assays, whilst multiplexed with RuV,  
389 did not include vaccine-specific primers and probes for either virus. The inclusion of vaccine-strain-  
390 specific primers and probes in the detection assay would facilitate interpretation of results and support  
391 immediate public health action. Lastly, there is no available evidence at this moment to support the need  
392 for normalizing PCR targets relative to population size using fecal indicators, flow rates or  
393 combinations thereof for MeV detection. All our retained samples tested positive for PMMoV at high  
394 genome copies/uL, indicating the presence of fecal contamination.

395 Optimal public health responses to detection of MeV in wastewater in the absence of clinical cases need  
396 careful consideration. Following detection of clinical cases, WHO presently recommends case  
397 investigation and diagnostic testing, contact tracing with ring vaccination, case finding, and district  
398 wide supplementary immunization activities (SIA) if a threshold of cases (two to five cases per health  
399 district per month) are identified.[33] Our approach to analysis of our findings, namely a comparison  
400 of wastewater and clinical surveillance data at a district level by epidemiological week, is informed by  
401 biological parameters of measles infection and WHO guidelines regarding public health responses to  
402 measles cases as follows: the incubation period of measles is 1-2 *weeks*, and current surveillance  
403 guidelines suggest a threshold of 2-5 cases *per district* in one month before initiating appropriate public  
404 health interventions[34]. Therefore, assessment of wastewater detection vs cases per week in a given  
405 geographical area may provide forewarning of incubating cases, and support heightened surveillance as  
406 a minimum public health response. However, as the sensitivity of WES MeV surveillance becomes  
407 clearer, and given the elimination agenda, it may become evident that WES MeV detection should  
408 trigger a supplementary immunization activity.

409 Our findings suggest that real-time WES for measles holds promise to support the global measles and  
410 rubella elimination agendas. WES may complement clinical surveillance or be used as the only  
411 surveillance modality in contexts with limited access to diagnostic testing. Evaluation of more efficient  
412 concentration, extraction and detection methods to improve sensitivity and provide sufficient material  
413 for genotyping are desirable. Integration of real-time MeV WES together with clinical surveillance  
414 may allow for sensitivity estimations and insight into public health actions following detection of  
415 wastewater.



416

## 417 **Acknowledgements**

418 We would like to acknowledge the contribution of the NICD Centre for Vaccines and Immunology for  
419 use of the polio environmental laboratory, and measles surveillance data (also approved by Wits  
420 HREC). We thank the municipal workers, and NICD drivers who collected and transported certain  
421 wastewater samples. We thank our sample collectors Lebohang Rabotapi, Lethabo Monametsi, and  
422 laboratory technicians Thabo Mangena, Mantshali Motloung for collecting and initial processing of  
423 the samples, and our administrator Namhla Madikane for her helpful support and willingness to go to  
424 the field when necessary.

425

## 426 **Supplementary material**

427

428

429 **Figure S1. Epidemiological curves by province of South Africa showing the number of IgM**  
430 **positive cases submitted to the National Institute for Communicable Diseases as part of fever-**  
431 **rash surveillance and the number of positive wastewater samples (green) by epidemiological**  
432 **week (2021, week 52, to 2024, week 10)**

433 **Figure S2. The number of laboratory-confirmed measles cases (vertical axis) by the number of**  
434 **genome copies of measles virus per millilitre of wastewater (horizontal axis) in wastewater**  
435 **collected from a sample collection point in the district where the measles case was identified**  
436 **(n=43)**

437

438

439

440

## 441 **References**

- 442 1. WHO. Measles and Rubella Strategic Framework: 2020-2030. Geneva: WHO; 2020. Available:  
443 <https://www.who.int/publications/i/item/measles-and-rubella-strategic-framework-2021-2030>
- 444 2. Dixon MG, Ferrari M, Antoni S, Li X, Portnoy A, Lambert B, et al. Progress Toward Regional Measles  
445 Elimination - Worldwide, 2000-2020. *MMWR Morb Mortal Wkly Rep.* 2021;70: 1563–1569.  
446 doi:10.15585/mmwr.mm7045a1
- 447 3. Minta AA, Ferrari M, Antoni S, Portnoy A, Sbarra A, Lambert B, et al. Progress Toward Measles  
448 Elimination - Worldwide, 2000-2022. *MMWR Morb Mortal Wkly Rep.* 2023;72: 1262–1268.  
449 doi:10.15585/mmwr.mm7246a3
- 450 4. Measles vaccines: WHO position paper – April 2017. *Releve Epidemiol Hebd.* 2017;92: 205–227.

- 451 5. Patel MK, Gibson R, Cohen A, Dumolard L, Gacic-Dobo M. Global landscape of measles and rubella  
452 surveillance. *Vaccine*. 2018;36: 7385–7392. doi:10.1016/j.vaccine.2018.10.007
- 453 6. Orenstein WA, Hinman A, Nkowane B, Olive JM, Reingold A. Measles and Rubella Global Strategic  
454 Plan 2012-2020 midterm review. *Vaccine*. 2018;36 Suppl 1: A1–A34. doi:10.1016/j.vaccine.2017.09.026
- 455 7. Hübschen JM, Gouandjika-Vasilache I, Dina J. Measles. *Lancet Lond Engl*. 2022;399: 678–690.  
456 doi:10.1016/S0140-6736(21)02004-3
- 457 8. World Health Organization. Manual for the laboratory-based surveillance of measles, rubella, and  
458 congenital rubella syndrome. Geneva, Switzerland; 2018. Available: [https://www.who.int/immunization/  
459 monitoring\\_surveillance/burden/laboratory/manual/en/](https://www.who.int/immunization/monitoring_surveillance/burden/laboratory/manual/en/)
- 460 9. Yousif M, Hong H, Malfeld S, Smit S, Makhathini L, Motsamai T, et al. Measles incidence in South  
461 Africa: a six-year review, 2015–2020. *BMC Public Health*. 2022;22: 1647. doi:10.1186/s12889-022-14069-w
- 462 10. McMorrow ML, Gebremedhin G, van den Heever J, Kezaala R, Harris BN, Nandy R, et al. Measles  
463 outbreak in South Africa, 2003–2005. *South Afr Med J Suid-Afr Tydskr Vir Geneesk*. 2009;99: 314–319.
- 464 11. Ntshoe GM, McAnerney JM, Archer BN, Smit SB, Harris BN, Tempia S, et al. Measles outbreak in  
465 South Africa: epidemiology of laboratory-confirmed measles cases and assessment of intervention, 2009–2011.  
466 *PloS One*. 2013;8: e55682. doi:10.1371/journal.pone.0055682
- 467 12. National Institute for Communicable diseases. South African Measles Outbreak Update, 2023.  
468 Johannesburg, South Africa: National Institute for Communicable Diseases; 2023 Jun. Available:  
469 <https://www.nicd.ac.za/south-african-measles-outbreak-update-2023-2-june-2023/>
- 470 13. National Institute for Communicable diseases. Measles and Rubella Monthly Surveillance Report, 8  
471 April 2024. Johannesburg, South Africa: National Institute for Communicable Diseases; 2024 Apr. Available:  
472 <https://www.nicd.ac.za/measles-and-rubella-monthly-surveillance-report-08-april-2023/>
- 473 14. Global polio elimination initiative. Polio Eradication Strategy 2022–2026: Delivering on a Promise.  
474 WHO; 2022. Available: <https://polioeradication.org/gpei-strategy-2022-2026/>
- 475 15. O’Reilly KM, Verity R, Durry E, Asghar H, Sharif S, Zaidi SZ, et al. Population sensitivity of acute  
476 flaccid paralysis and environmental surveillance for serotype 1 poliovirus in Pakistan: an observational study.  
477 *BMC Infect Dis*. 2018;18: 176. doi:10.1186/s12879-018-3070-4
- 478 16. Kilaru P, Hill D, Anderson K, Collins MB, Green H, Kmush BL, et al. Wastewater Surveillance for  
479 Infectious Disease: A Systematic Review. *Am J Epidemiol*. 2023;192: 305–322. doi:10.1093/aje/kwac175
- 480 17. Wolfe MK, Yu AT, Duong D, Rane MS, Hughes B, Chan-Herur V, et al. Use of Wastewater for Mpox  
481 Outbreak Surveillance in California. *N Engl J Med*. 2023;388: 570–572. doi:10.1056/NEJMc2213882
- 482 18. WHO. Environmental surveillance for SARS-CoV-2 to complement other public health surveillance.  
483 Geneva, Switzerland; 2023. Available: <https://www.who.int/publications/i/item/9789240080638>
- 484 19. Shaw AG, Troman C, Akello JO, O’Reilly KM, Gauld J, Grow S, et al. Defining a research agenda for  
485 environmental wastewater surveillance of pathogens. *Nat Med*. 2023;29: 2155–2157. doi:10.1038/s41591-023-  
486 02457-7
- 487 20. Hayes EK, Gouthro MT, LeBlanc JJ, Gagnon GA. Simultaneous detection of SARS-CoV-2, influenza  
488 A, respiratory syncytial virus, and measles in wastewater by multiplex RT-qPCR. *Sci Total Environ*. 2023;889:  
489 164261. doi:10.1016/j.scitotenv.2023.164261
- 490 21. Wu J, Wang MX, Kalvapalle P, Nute M, Treangen TJ, Ensor K, et al. Multiplexed detection,  
491 partitioning, and persistence of wild type and vaccine strains of measles, mumps, and rubella viruses in  
492 wastewater. *medRxiv*; 2024. p. 2024.05.23.24307763. doi:10.1101/2024.05.23.24307763
- 493 22. Kevill JL, Lambert-Slosarska K, Pellett C, Woodhall N, Richardson-O’Neill I, Pântea I, et al.  
494 Assessment of two types of passive sampler for the efficient recovery of SARS-CoV-2 and other viruses from  
495 wastewater. *Sci Total Environ*. 2022;838: 156580. doi:10.1016/j.scitotenv.2022.156580

- 496 23. Rector A, Bloemen M, Hoorelbeke B, Ranst MV, Wollants E. Detection of measles virus genotype D8  
497 in wastewater of Brussels capital region, Belgium, March 2024. medRxiv; 2024. p. 2024.04.08.24305478.  
498 doi:10.1101/2024.04.08.24305478
- 499 24. Benschop KSM, van der Avoort HG, Jusic E, Vennema H, van Binnendijk R, Duizer E. Polio and  
500 Measles Down the Drain: Environmental Enterovirus Surveillance in the Netherlands, 2005 to 2015. Appl  
501 Environ Microbiol. 2017;83: e00558-17. doi:10.1128/AEM.00558-17
- 502 25. NICD. Wastewater-based epidemiology for SARS-CoV-2 surveillance in South Africa - weekly report.  
503 Johannesburg, South Africa: NICD; 2024 Epidemiological week. Available: [https://www.nicd.ac.za/diseases-a-](https://www.nicd.ac.za/diseases-a-z-index/disease-index-covid-19/surveillance-reports/weekly-reports/wastewater-based-epidemiology-for-sars-cov-2-in-south-africa/)  
504 [z-index/disease-index-covid-19/surveillance-reports/weekly-reports/wastewater-based-epidemiology-for-sars-](https://www.nicd.ac.za/diseases-a-z-index/disease-index-covid-19/surveillance-reports/weekly-reports/wastewater-based-epidemiology-for-sars-cov-2-in-south-africa/)  
505 [cov-2-in-south-africa/](https://www.nicd.ac.za/diseases-a-z-index/disease-index-covid-19/surveillance-reports/weekly-reports/wastewater-based-epidemiology-for-sars-cov-2-in-south-africa/)
- 506 26. Yoshioka N, Hagiya H, Deguchi M, Hamaguchi S, Kagita M, Tomono K. Simultaneous and rapid  
507 detection method for measles and rubella using single-tube multiplex real-time quantitative RT-PCR. J Infect  
508 Chemother Off J Jpn Soc Chemother. 2019;25: 829–831. doi:10.1016/j.jiac.2019.05.005
- 509 27. Cantillon D, Roberts AP. Development and evaluation of TaqMan-based, one-step, real-time RT-PCR  
510 assays for pepper mild mottle virus detection for near source tracking and wastewater-based epidemiology  
511 validation. PloS One. 2022;17: e0278784. doi:10.1371/journal.pone.0278784
- 512 28. Yamada KD, Tomii K, Katoh K. Application of the MAFFT sequence alignment program to large  
513 data—reexamination of the usefulness of chained guide trees. Bioinformatics. 2016;32: 3246–3251.  
514 doi:10.1093/bioinformatics/btw412
- 515 29. Carlsblad, C. H T. BioEdit: An important software for molecular biology. GEF bulletin of  
516 Biosciences. 2011;2: 60–61.
- 517 30. Rota PA, Khan AS, Durigon E, Yuran T, Villamarzo YS, Bellini WJ. Detection of measles virus RNA  
518 in urine specimens from vaccine recipients. J Clin Microbiol. 1995;33: 2485–2488. doi:10.1128/jcm.33.9.2485-  
519 2488.1995
- 520 31. Hovi T, Stenvik M, Partanen H, Kangas A. Poliovirus surveillance by examining sewage specimens.  
521 Quantitative recovery of virus after introduction into sewerage at remote upstream location. Epidemiol Infect.  
522 2001;127: 101–106. doi:10.1017/s0950268801005787
- 523 32. Rusiñol M, Martínez-Puchol S, Forés E, Itarte M, Girones R, Bofill-Mas S. Concentration methods for  
524 the quantification of coronavirus and other potentially pandemic enveloped virus from wastewater. Curr Opin  
525 Environ Sci Health. 2020;17: 21–28. doi:10.1016/j.coesh.2020.08.002
- 526 33. WHO. Measles outbreak guide. Geneva, Switzerland: WHO; 2022. Available:  
527 <https://www.who.int/publications/i/item/9789240052079>
- 528 34. WHO. WHO African Regional measles and rubella surveillance guidelines. WHO AFRO; 2015.  
529 Available: [https://www.afro.who.int/publications/who-african-regional-measles-and-rubella-surveillance-](https://www.afro.who.int/publications/who-african-regional-measles-and-rubella-surveillance-guidelines-0)  
530 [guidelines-0](https://www.afro.who.int/publications/who-african-regional-measles-and-rubella-surveillance-guidelines-0)
- 531



|                       | Forward Primer |                        |                        | Probe                           |                        |                     | Reverse Primer      |                     |                     |                     |
|-----------------------|----------------|------------------------|------------------------|---------------------------------|------------------------|---------------------|---------------------|---------------------|---------------------|---------------------|
|                       | 1400           | 1410                   | 1420                   | 1430                            | 1440                   | 1450                | 1460                | 1470                | 1480                | 1490                |
| AF266288.2 Edmonston  | acc            | gagattggggggcaaggaagat | aggaggggtcaaacagagtcga | ggagaagccagggagagctacagagaaaccg | ggcccagcagagcaagtgatgc |                     |                     |                     |                     |                     |
| MN893225.1 Measles B3 | g              | .....c.....t.....g.c   | .....ac.....           | .....g.....c.....               | .....g.....c.....      | .....g.....c.....   | .....g.....c.....   | .....g.....c.....   | .....g.....c.....   | .....g.....c.....   |
| OR290098.1 Measles B3 | g              | .....t.....g.c         | .....a.ac.....         | .....c.....c.....               | .....a.....t.....      | .....a.....t.....   | .....a.....t.....   | .....a.....t.....   | .....a.....t.....   | .....a.....t.....   |
| OR290098.1 Measles B3 | g              | .....t.....g.c         | .....a.ac.....         | .....c.....c.....               | .....a.....t.....      | .....a.....t.....   | .....a.....t.....   | .....a.....t.....   | .....a.....t.....   | .....a.....t.....   |
| KX838946.2 Measles B3 | g              | .....t.....g.c         | .....ac.....           | .....c.....c.....               | .....a.....t.....      | .....a.....t.....   | .....a.....t.....   | .....a.....t.....   | .....a.....t.....   | .....a.....t.....   |
| PP998307.1 Measles D8 | ..             | ag.....                | .....g.....t.g         | .....g.....g.....               | .....a.....t.....      | .....a.....t.....   | .....a.....t.....   | .....a.....t.....   | .....a.....t.....   | .....a.....t.....   |
| MF496200.1 Measles D8 | ..             | ag.....                | .....g.....g.....      | .....g.....g.....               | .....a.....t.....      | .....a.....t.....   | .....a.....t.....   | .....a.....t.....   | .....a.....t.....   | .....a.....t.....   |
| MF496201.1 Measles D8 | ..             | ag.....                | .....g.....g.....      | .....g.....g.....               | .....a.....t.....      | .....a.....t.....   | .....a.....t.....   | .....a.....t.....   | .....a.....t.....   | .....a.....t.....   |
| MH356237.1 Measles D8 | g              | ag.....                | .....gg.g.....g        | .....tagtg.....t                | .....t.....ttg.....    | .....t.....ttg..... | .....t.....ttg..... | .....t.....ttg..... | .....t.....ttg..... | .....t.....ttg..... |
| MZ483930.1 Measles H1 | ..             | g.....                 | .....a.....g.....a     | .....a.....c.....               | .....g.....g.....      | .....g.....g.....   | .....g.....g.....   | .....g.....g.....   | .....g.....g.....   | .....g.....g.....   |
| MZ483937.1 Measles H1 | ..             | g.....                 | .....a.....g.....a     | .....a.....c.....               | .....g.....g.....      | .....g.....g.....   | .....g.....g.....   | .....g.....g.....   | .....g.....g.....   | .....g.....g.....   |
| KJ755976.1 Measles H1 | ..             | g.....                 | .....a.....g.....a     | .....a.....c.....               | .....g.....g.....      | .....g.....g.....   | .....g.....g.....   | .....g.....g.....   | .....g.....g.....   | .....g.....g.....   |
| KJ755979.1 Measles H1 | ..             | g.....                 | .....a.....g.....a     | .....a.....c.....               | .....g.....g.....      | .....g.....g.....   | .....g.....g.....   | .....g.....g.....   | .....g.....g.....   | .....g.....g.....   |

Figure X. Primers and probe design to differentiate measles virus vaccine strain (Edmonston) from wild genotypes (B3, D8, and H1).

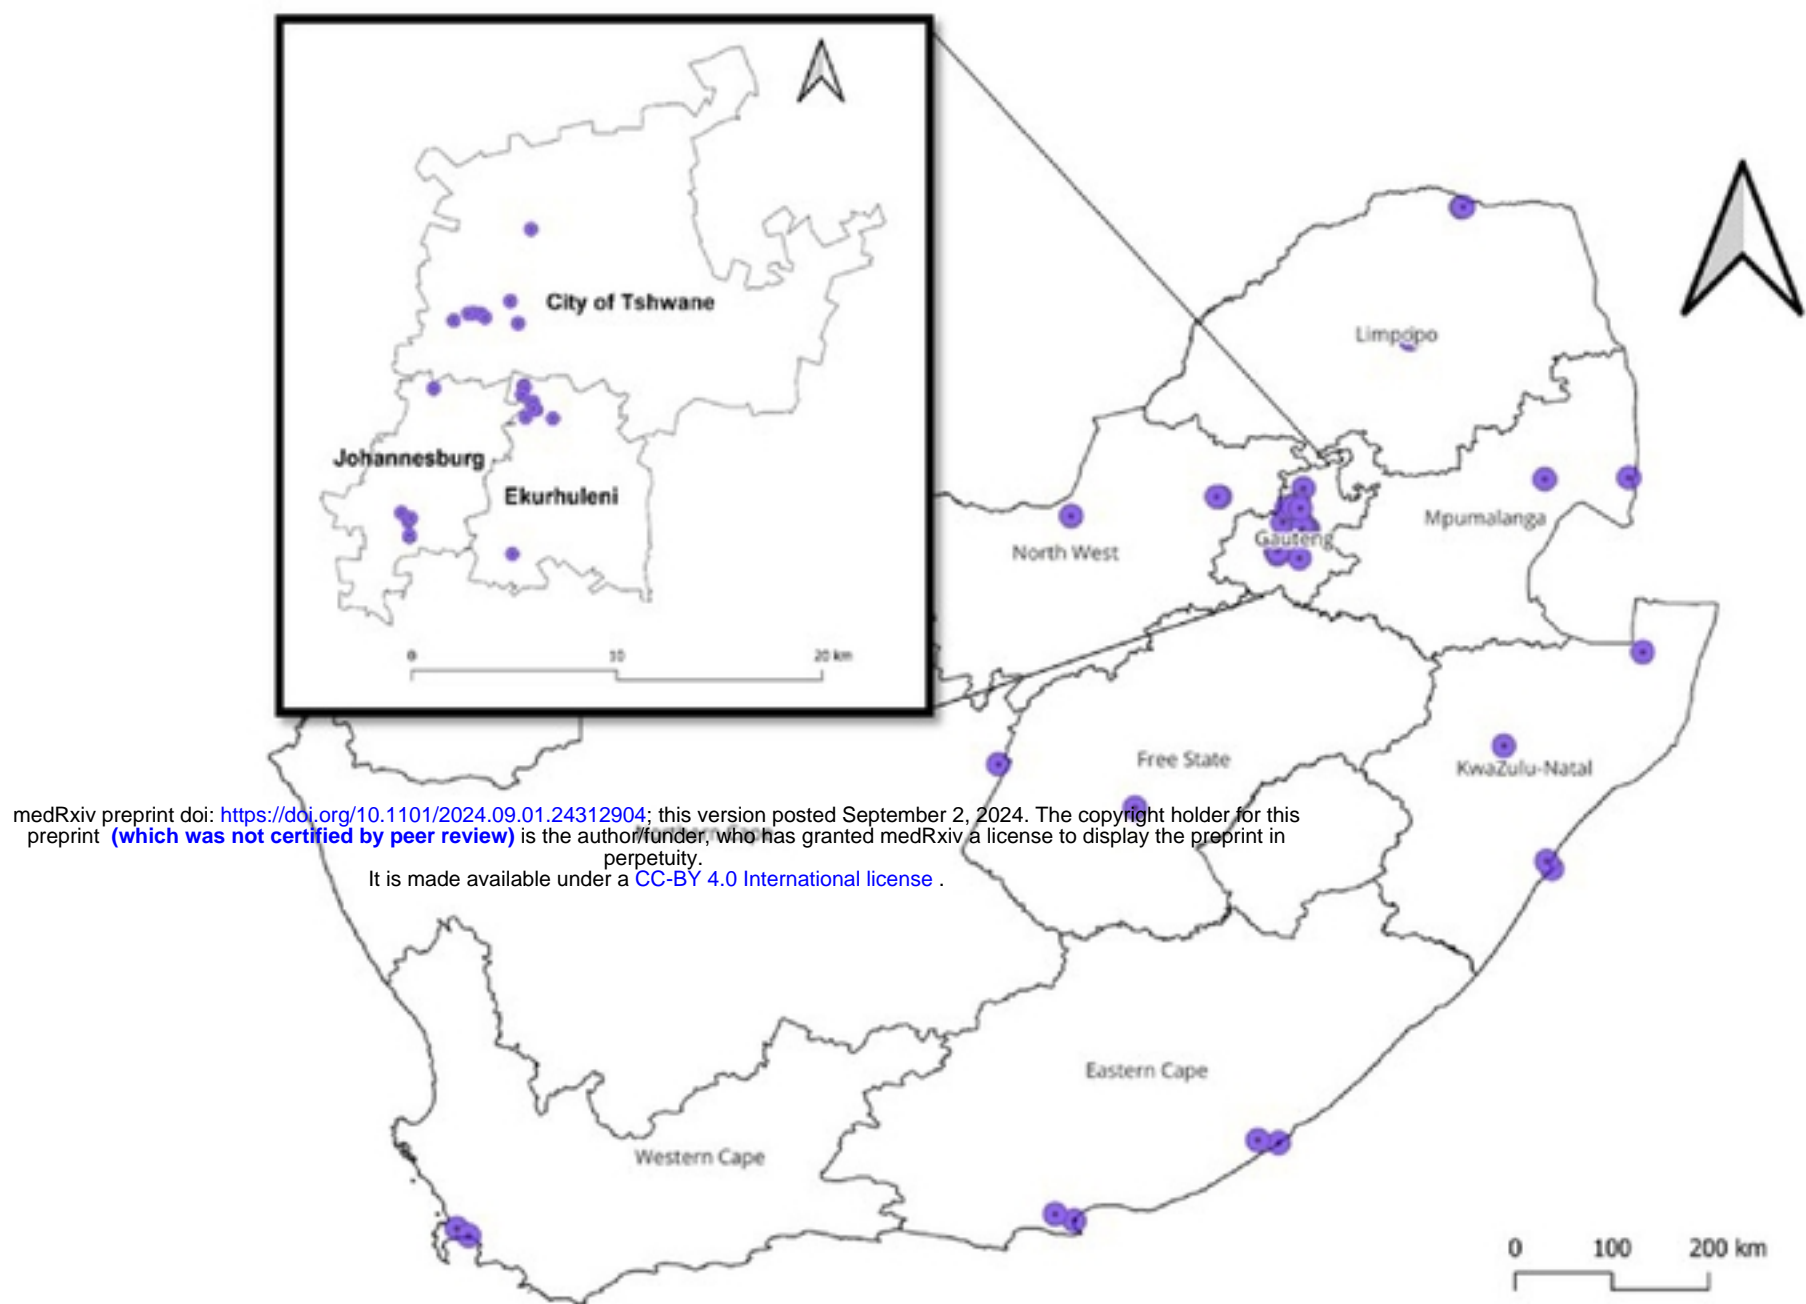

**Figure S1. Sampling locations at South African wastewater treatment plants (national sentinel surveillance sites) and in-line sewers (case-study sub-catchment areas in City of Tshwane, Johannesburg and Ekurhuleni, inset)**



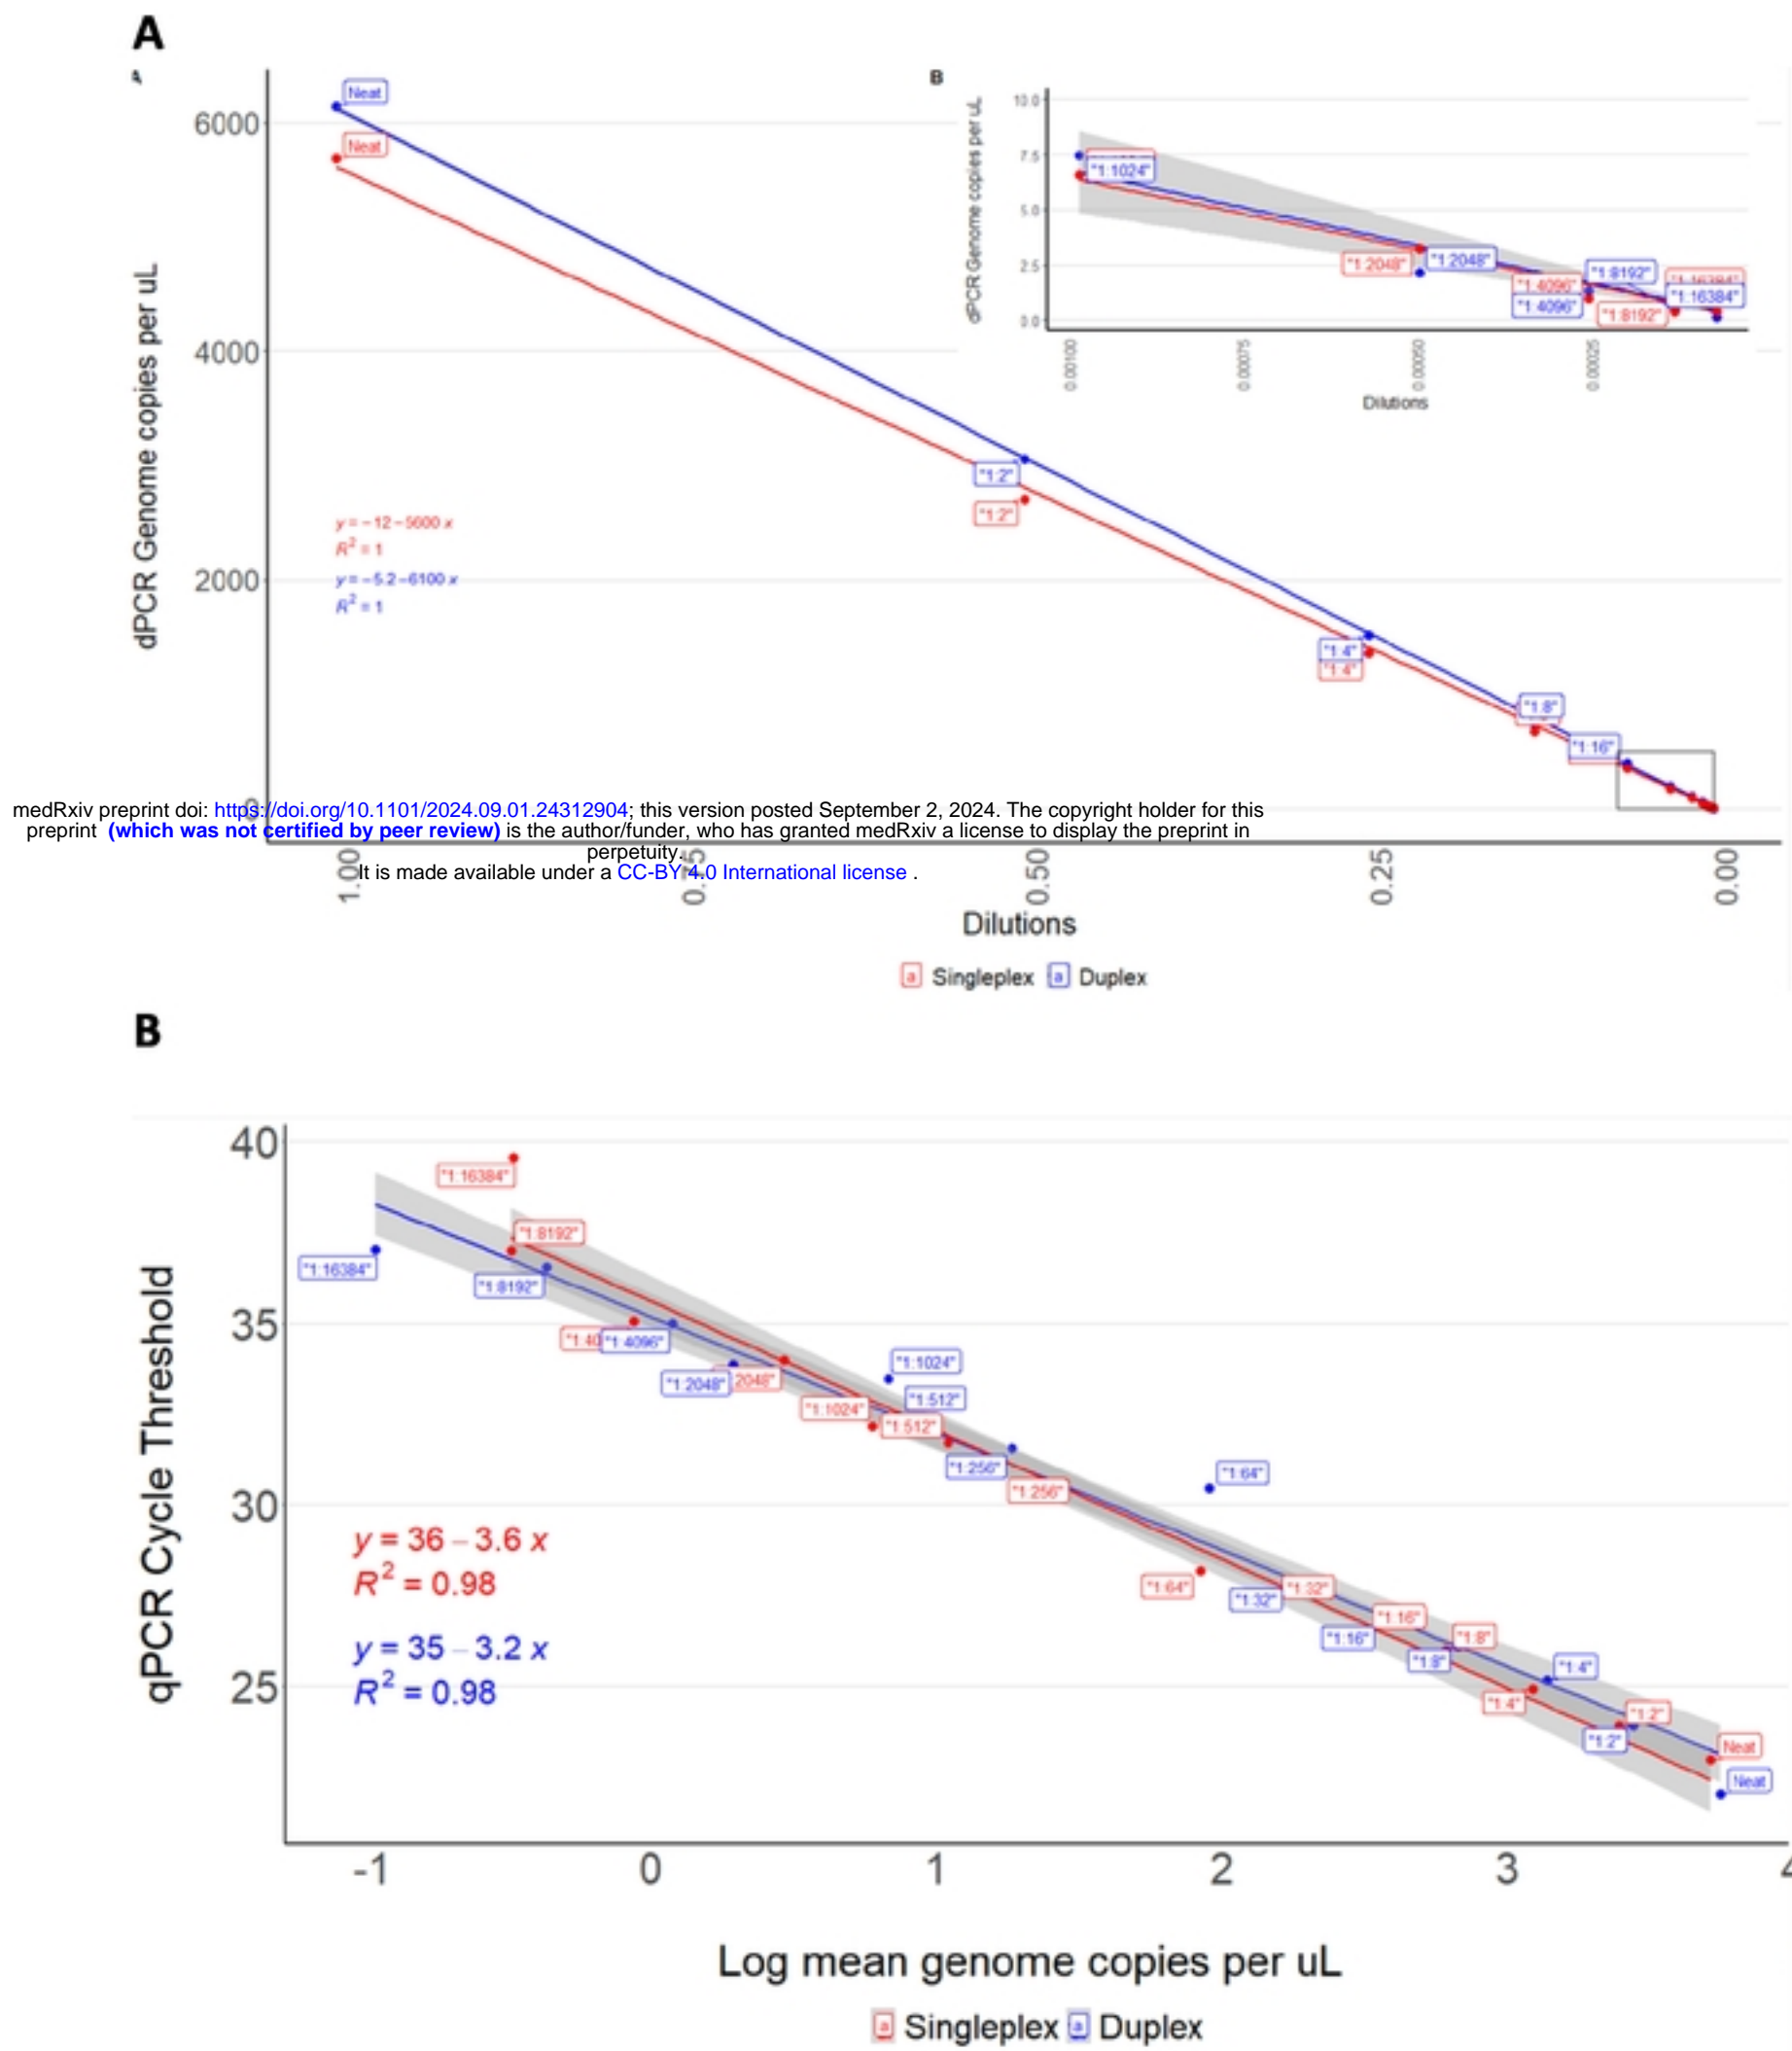

Figure 1. Graphs constructed for PCR reactions using serial dilutions (1:32 to 1:16,384) of control sequences (obtained from the World Health Organization Global Measles and Rubella Laboratory Network programme) of measles virus (MeV, red) and MeV duplexed with rubella virus (RuV, blue) showing (A) genome copies per microlitre of reaction (vertical axis) by dilution, (dilutions 1:32, 1:64, 1:128, 1:256, 1:512 omitted from the insert) and (B) the cycle threshold (vertical axis) and log of genome copies per microlitre (gc/uL) (horizontal axis). The limit of quantification was determined to be 0,365 gc/uL in duplex reaction with RuV.

**A**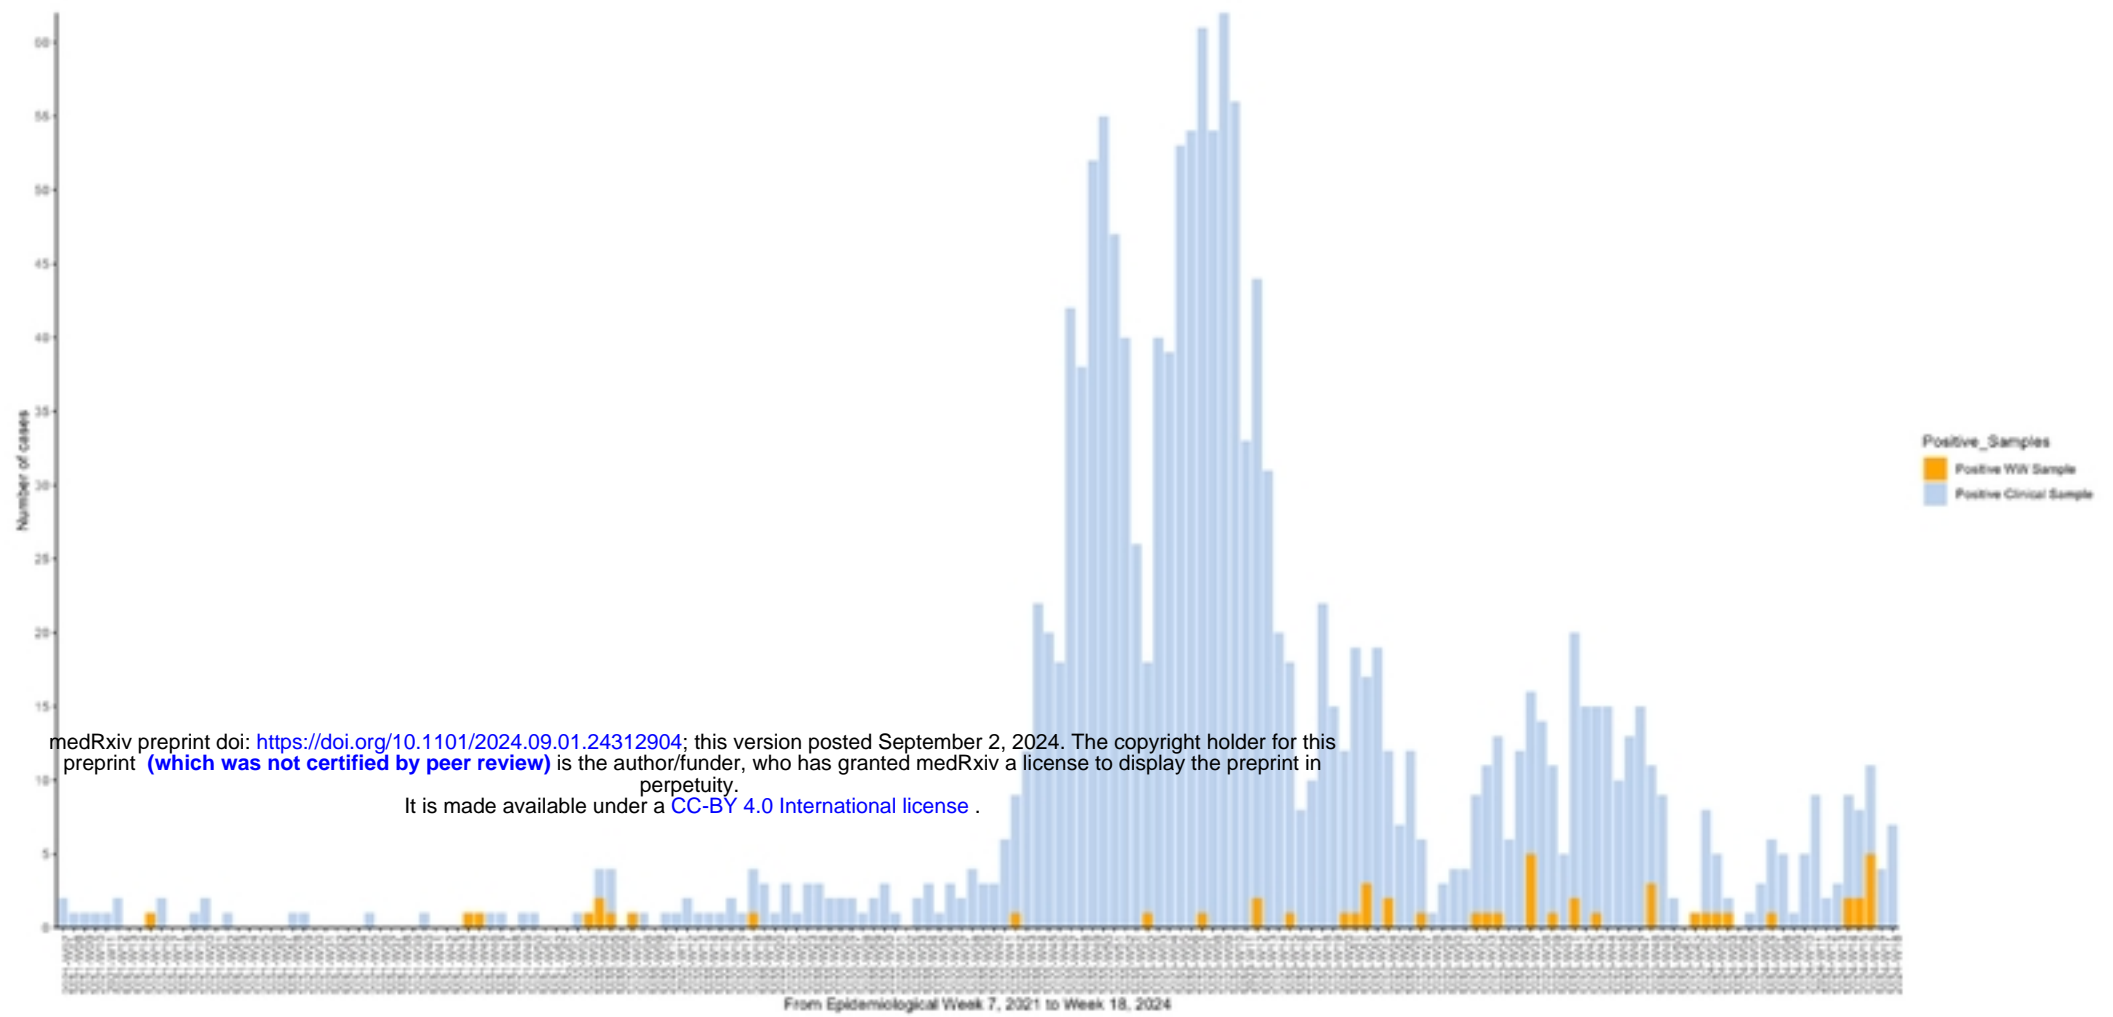**B**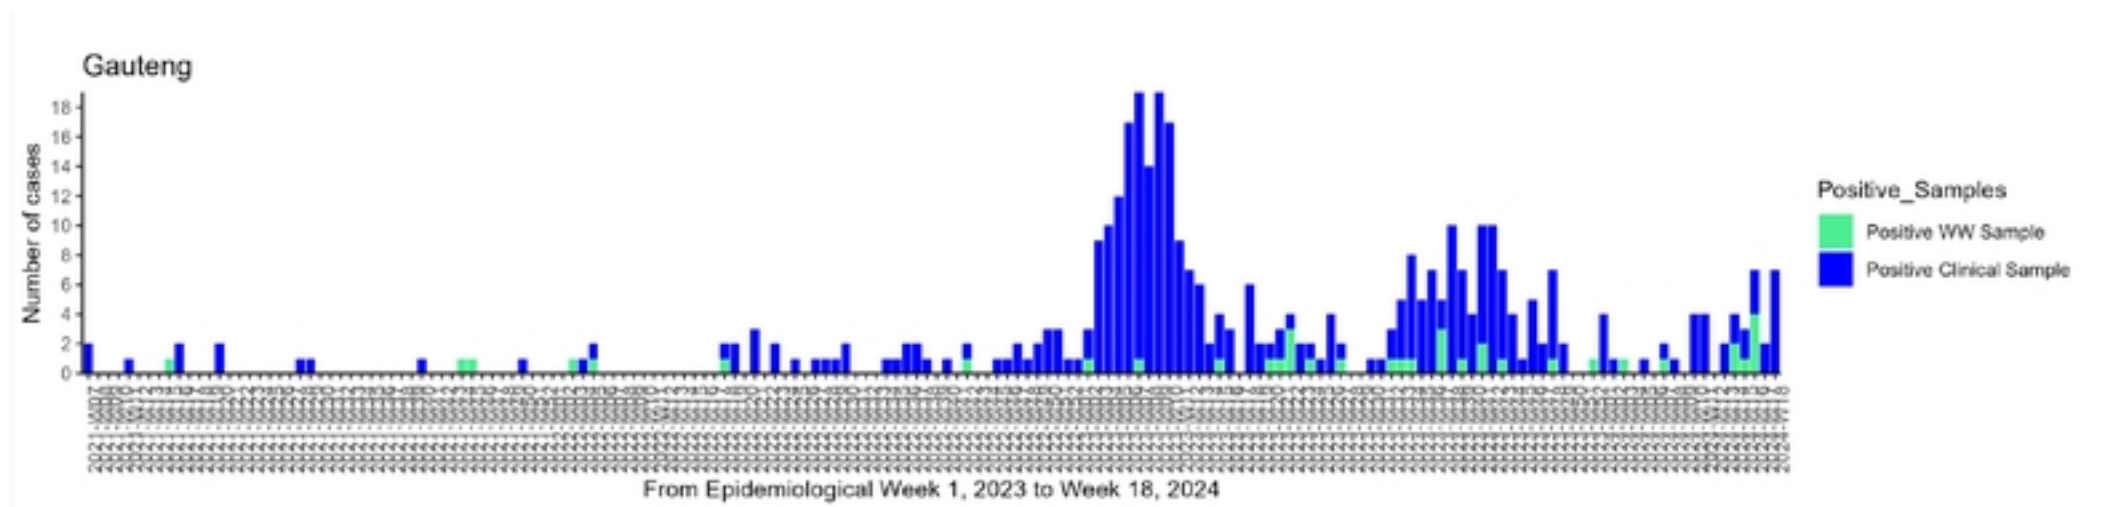

Figure 2. Epidemiological curve showing the number of IgM positive cases submitted to the National Institute for Communicable Diseases as part of fever-rash surveillance (blue bars) and the number of positive wastewater samples (orange or green) by epidemiological week (2021, week 52, to 2024, week 10) from A) the entire South Africa, and B) Gauteng province



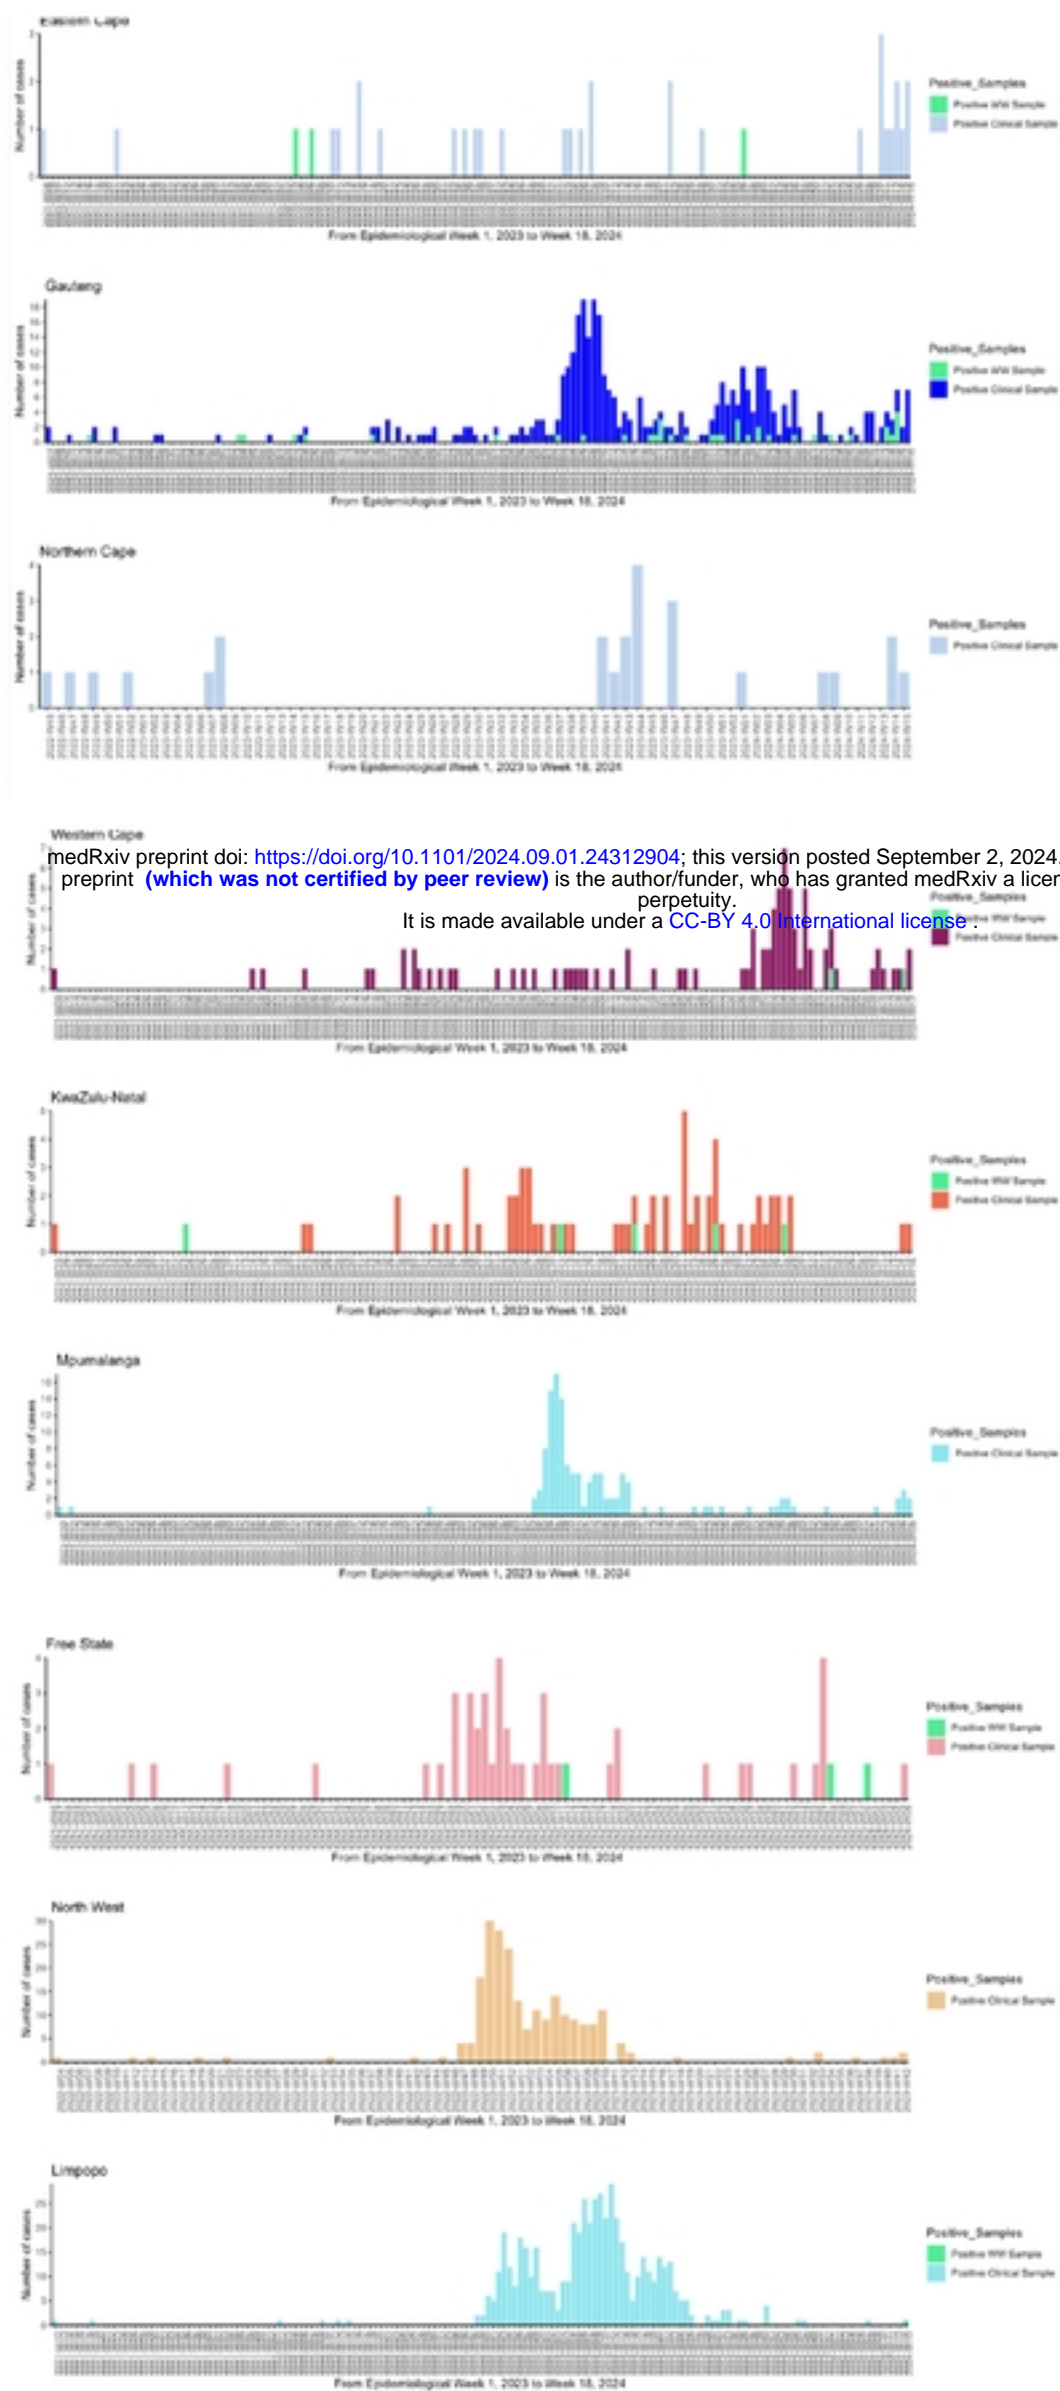

Figure S2. Epidemiological curves by province of South Africa showing the number of IgM positive cases submitted to the National Institute for Communicable Diseases as part of fever-rash surveillance and the number of positive wastewater samples (green) by epidemiological week (2021, week 52, to 2024, week 10)

medRxiv preprint doi: <https://doi.org/10.1101/2024.09.01.24312904>; this version posted September 2, 2024. The copyright holder for this preprint **(which was not certified by peer review)** is the author/funder, who has granted medRxiv a license to display the preprint in perpetuity.  
It is made available under a [CC-BY 4.0 International license](#) .

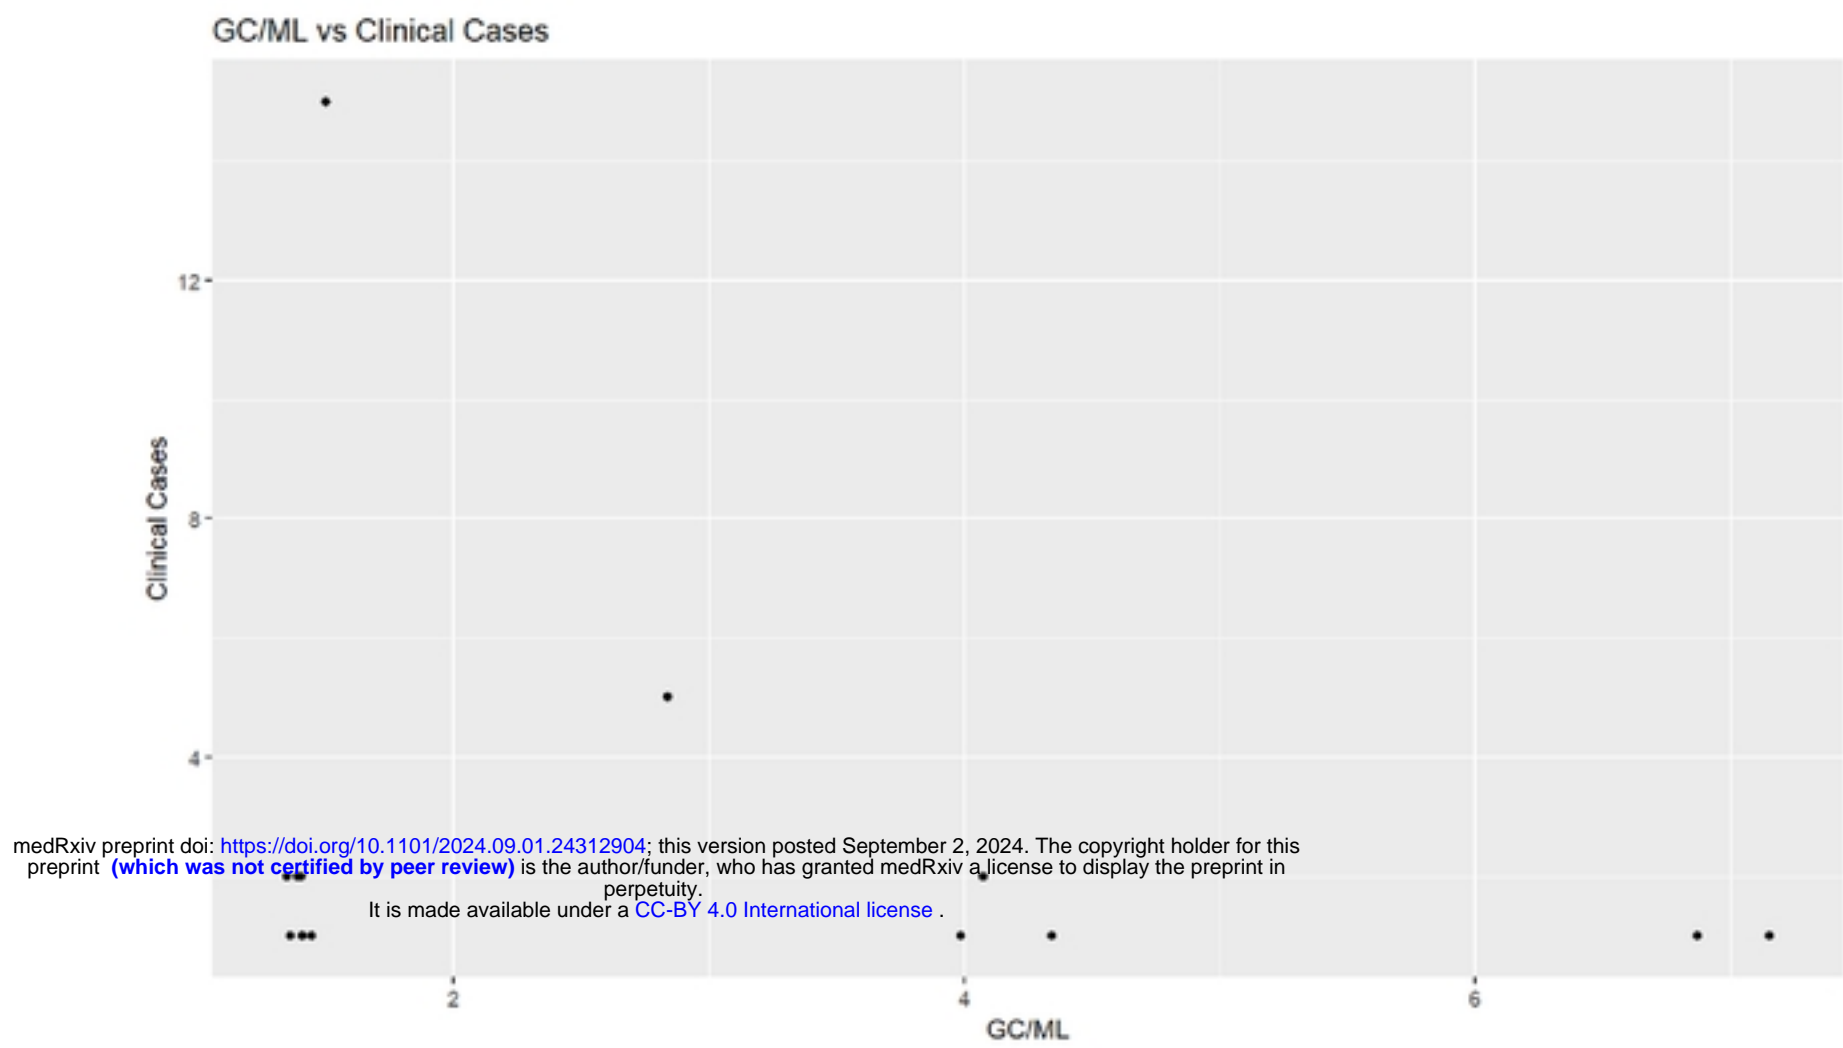

**Figure S3. The number of laboratory-confirmed measles cases (vertical axis) by the number of genome copies of measles virus per millilitre of wastewater (horizontal axis) in wastewater collected from a sample collection point in the district where the measles case was identified (n=43)**
